# Supplementary material for: Real-time forecasting of emergency department arrivals using prehospital data
Source: Springer Nature journal article supplement (doi:10.1186/s12873-019-0256-z), 2019-08-05
Supplement: MOESM1 [file 17039538]

## Derivation of approximate hazard function

We assume the time from patient record creation,  $t=0$ , to patient arrival,  $t=T$ , is distributed according to an approximate hazard function,

$$\lambda_d(t) = \frac{P(t \leq T < t + d | t \leq T)}{d}$$

We will not use the actual instantaneous hazard function, which is obtained by taking the limit  $d \rightarrow 0$ . Rather we use  $\lambda_1(t)$ ,  $\lambda_2(t)$  and  $\lambda_3(t)$ , denoting the probability of arrival within 1, 2 and 3 hours respectively, given that the patient had not having arrived at time  $t$ .

Now assume  $n(t)$  patients had records created, but were not arrived at time  $t$ , with time of record creation being  $\tau_1, \tau_2, \dots, \tau_{n(t)}$  respectively. The expected number of arrivals would be the sum of the approximate hazard functions, translated to the correct origin,

$$E[\text{Arrivals within } d \text{ hours}] = \lambda_d(t - \tau_1) + \lambda_d(t - \tau_2) + \dots + \lambda_d(t - \tau_{n(t)})$$

If the hazard function is approximated by a truncated polynomial of degree  $m$ ,

$$\lambda_d(t) \approx a + bt + ct^2$$

then,

$$E[\text{Arrivals within } d \text{ hours}] \approx a \cdot n(t) + b \sum_{j=1}^{n(t)} (t - \tau_j) + c \sum_{j=1}^{n(t)} (t - \tau_j)^2$$
