# Supplementary material for: Real-time forecasting of emergency department arrivals using prehospital data
Source: Springer Nature journal article supplement (doi:10.1186/s12873-019-0256-z), 2019-08-05

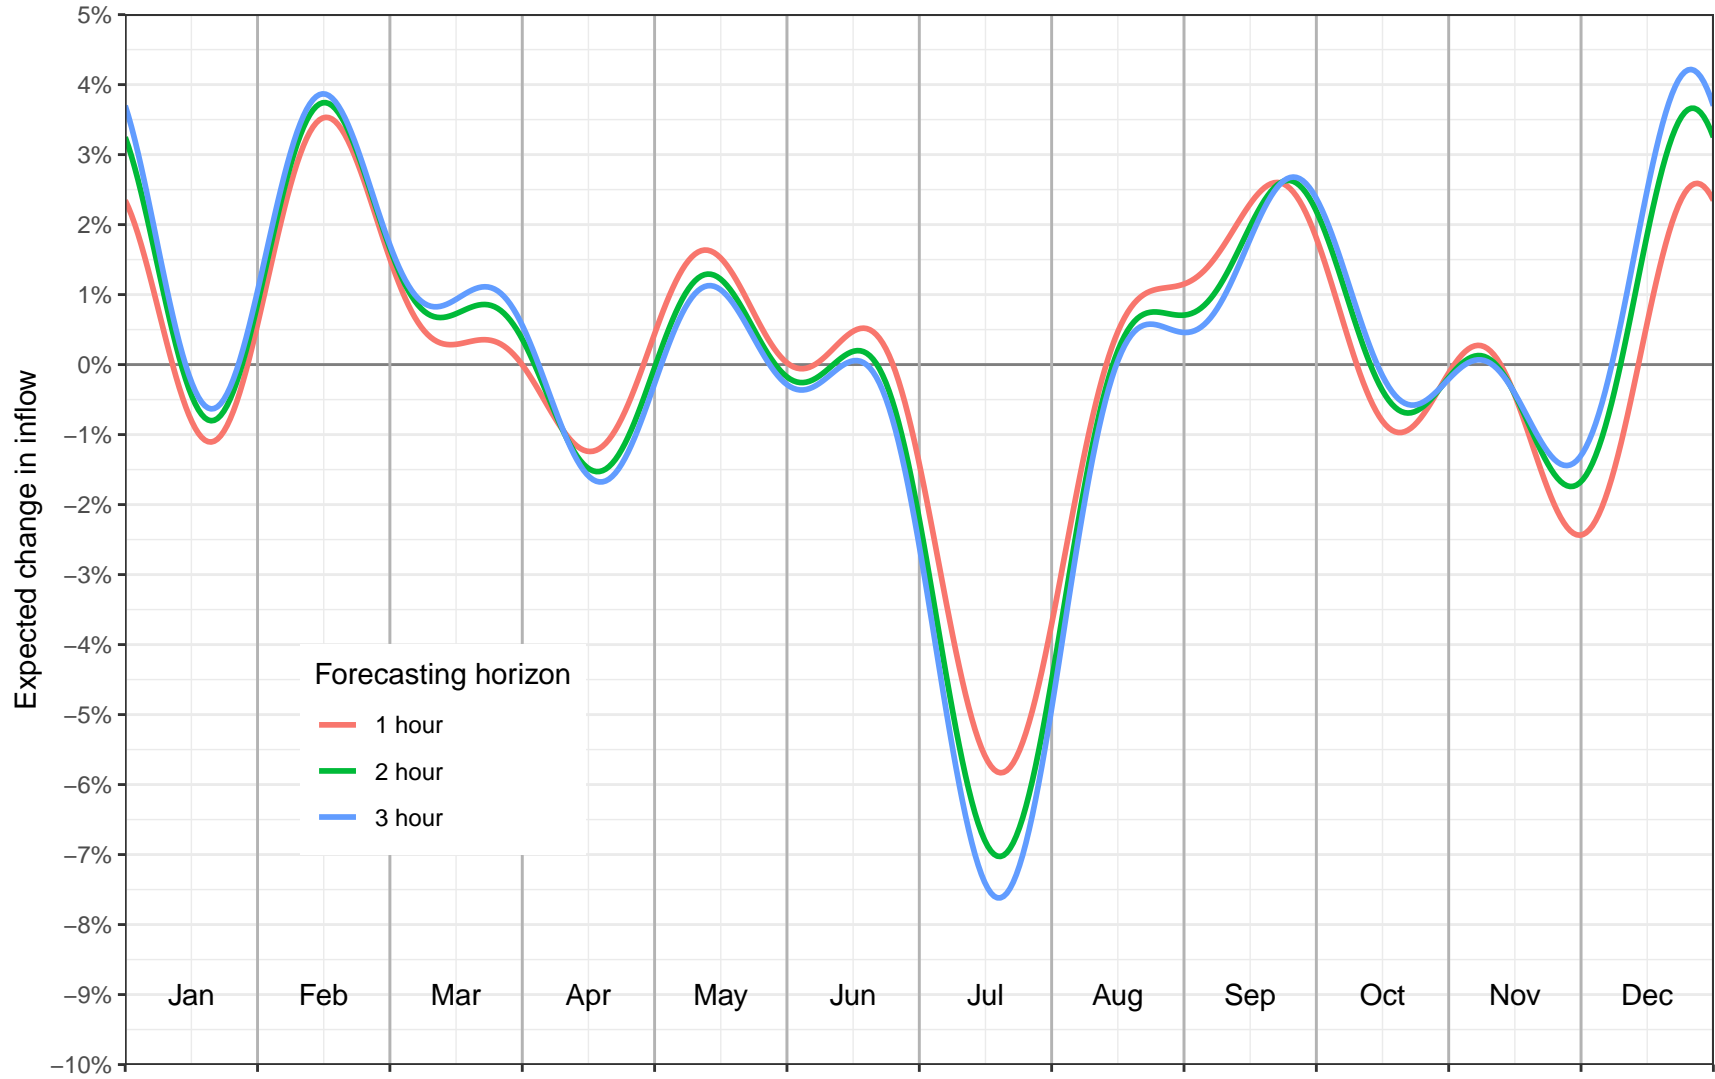

Supplement: MOESM3 [file 17039538]
